# Supplementary material for: Probing magnetic interactions in columnar phases of a paramagnetic gold dithiolene complex
Source: Royal Society of Chemistry journal article supplement (doi:10.1039/c0jm02171g), 2010-10-20
Supplement: c0jm02171g.pdf [file c0jm02171g.pdf]

## Supporting information

### Probing Magnetic Interactions in Columnar Phases of Paramagnetic Gold Dithiolene Complexes

*Romain Perochon, Patrick Davidson, Stéphan Rouzière, Franck Camerel,\* Lidia Piekara-Sady, Thierry Guizouarn and Marc Fourmigué\**

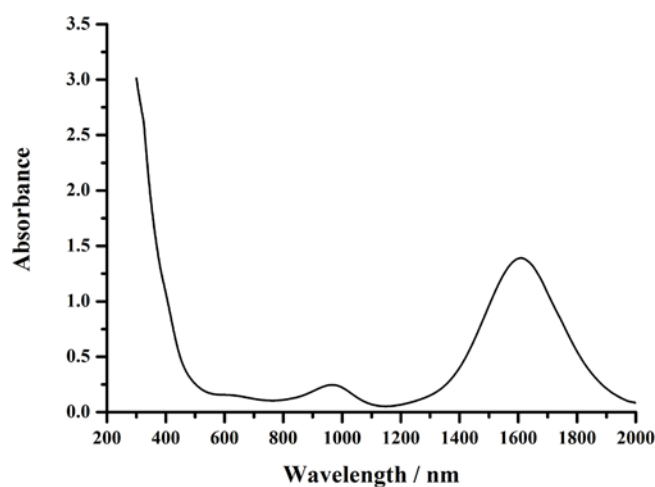

**Figure S1.** UV-vis-NIR spectrum of  $[\text{Au}(\text{OC}_{12})_8]$  ( $\text{CH}_2\text{Cl}_2$ ,  $10^{-4}$  M)

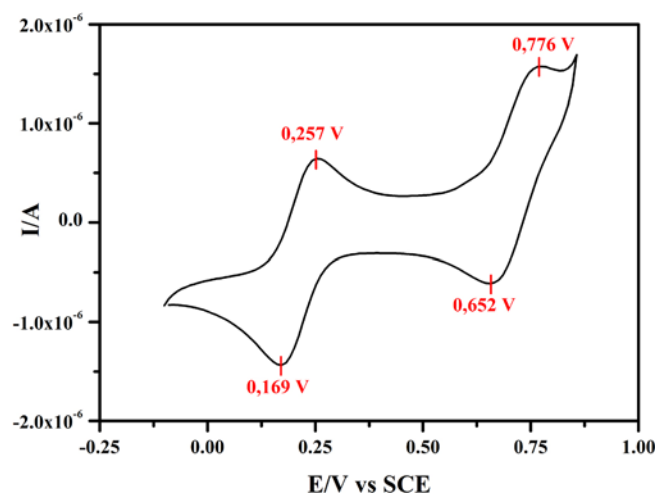

**Figure S2.** Cyclic voltammogram of  $[\text{Au}(\text{OC}_{12})_8]$  ( $1.5 \cdot 10^{-3}$  M), in V vs. SCE,  $\text{CH}_2\text{Cl}_2$ ,  $n\text{Bu}_4\text{NPF}_6$  0.2 M.

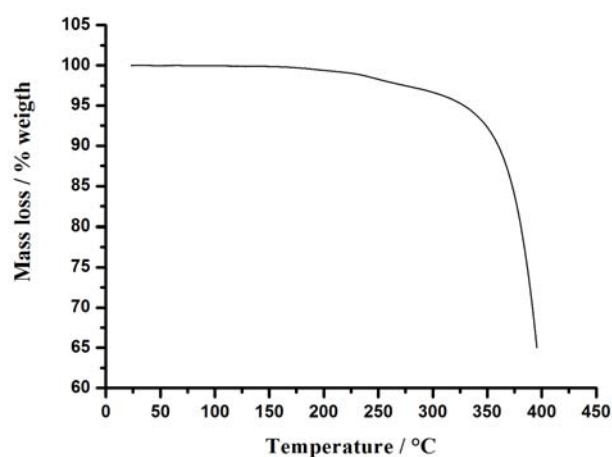

**Figure S3.** TGA curve of [Au(OC<sub>12</sub>)<sub>8</sub>] compound.

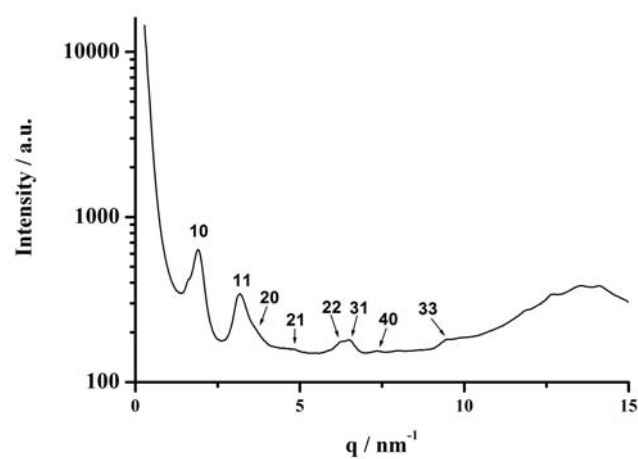

**Figure S4.** X-ray diffractogram of a gel of [Au(OC<sub>12</sub>)<sub>8</sub>] (C = 23 mM) in dodecane, recorded at room temperature.
